# Supplementary material for: Identification and functional analysis of missense mutations in the lecithin cholesterol acyltransferase gene in a Chilean patient with hypoalphalipoproteinemia
Source: PubMed Central journal article supplement (PMC6549291; doi:10.1186/s12944-019-1045-0), 2019-06-05
Supplement: 12944_2019_1045_MOESM7_ESM.pdf [file 12944_2019_1045_MOESM7_ESM.pdf]

|               | <b>Proband</b> | <b>Normal range</b> |
|---------------|----------------|---------------------|
| CE/CF in VLDL | 0.1            | 1.0 – 3.0           |
| CE/CF in LDL  | 0.3            | 3.5 – 5.7           |
| CE/CF in HDL  | 0.2            | 3.0 – 4.0           |
